# Supplementary material for: Patient, consumer and societal values, perceptions and preferences on high-cost gene therapies
Source: Research Square preprint supplement (doi:10.21203/rs.3.rs-7872591/v1), 2025-11-20
Supplement: Supplementary file 1 [file 05413278dc070cbe194eb0fc.docx]

**Table 2**: Focus group/interview characteristics

| **Focus group/interview type** | **Focus group (FG)**  **Interview (I)** | **Setting** | **Facilitator*** | **No. of participants** |
| --- | --- | --- | --- | --- |
| Haemophilia B Patient | FG | Online | KP | 6 |
| Haemophilia B Patient | FG | Online | JW | 6 |
| Haemophilia B Patient | FG | Online | KP | 2 |
| Haemophilia B Family/Carer | FG | Online | KP | 5 |
| Haemophilia B Family/Carer | FG | Online | JW | 6 |
| Haemophilia B family/carer | I | Online | KP | 1 |
| Haemophilia B Family/carer | FG | Online | KP | 3 |
| Haemophilia B family/carer | I | Online | KP | 1 |
| SCD Patient | I | Online | KP | 1 |
| SCD Patient | I | Online | KP | 1 |
| SCD Patient | I | Online | KP | 2 |
| SCD Patient | FG | Online | KP | 3 |
| SCD Patient | I | Online | KP | 1 |
| SCD Family/Carer | FG | Online | KP | 5 |
| SCD Family/Carer | FG | Online | KP | 6 |
| SCD Family/carer | FG | Online | KP | 2 |
| Beta Thalassemia Patient | I | Online | KP | 1 |
| Beta Thalassemia family/carer | I | Online | KP | 1 |
| Disease advocate | FG | Online | JW | 2 |
| General Population | FG | In-person | RDAL | 10 |
| General Population | FG | Online | RDAL | 6 |
| General Population | FG | In-person | RDAL | 10 |
| General Population | FG | Online | RDAL | 6 |
|  |  |  |  | TOTAL = 87 |

SCD: Sickle Cell Disease

*KP (Kristine Pierce), JW (Jo Watson), RDAL (Richard De Abreu Lourenco)
