# Supplementary material for: Patient, consumer and societal values, perceptions and preferences on high-cost gene therapies
Source: Research Square preprint supplement (doi:10.21203/rs.3.rs-7872591/v1), 2025-11-20
Supplement: Supplementary file 2 [file 2cd27221e4655286f4a197df.docx]

**Supplementary Data 1:** Facilitator characteristics

| **Interviewer/Facilitator** | **Credentials** | **Occupation** | **Experience and training** |
| --- | --- | --- | --- |
| Kristine Pierce | MHlthSci  MWellness  RN  Governance Foundation for NFP Directors  Cert. in Consumer Leadership | Consumer Advocate in rare diseases, and novel therapies/treatments settings and in primary care and community health | Extensive experience in conduct and analysis of qualitative work |
| Richard De Abreu Lourenco | BEc(Hons)  MEc(Hons)  PhD | Professor of Health Economics and Deputy Director at the Centre for Health Economics Research and Evaluation, University of Technology Sydney | Extensive experience in conduct and analysis of qualitative work |
| Jo Watson | BA (Soc.Sci)  MPH (Infectious Diseases Control) | Deputy Chair, Commonwealth Pharmaceutical Benefits Advisory Committee (PBAC)  Consumer Advocate | Extensive experience in conduct and analysis of qualitative work |
