# Supplementary material for: Patient, consumer and societal values, perceptions and preferences on high-cost gene therapies
Source: Research Square preprint supplement (doi:10.21203/rs.3.rs-7872591/v1), 2025-11-20
Supplement: Supplementary file 3 [file 4a77571a0f7b80acd2253358.docx]

**Table 1:** Indicative topic areas and questions for focus groups and interviews

| **Topic area** | **Indicative questions** |
| --- | --- |
| *Determination of baseline knowledge:*  Experience with gene therapies | - Let’s talk about any personal experience you might have had with gene therapy |
| Influences on decision making | - Thinking about the video and the sorts of funding decisions that are made, what kinds of information do you think would influence recommendations on whether to fund gene therapy or not? |
| Potential benefits and harms | - If you had a condition that a gene therapy was available for, would you have the gene therapy? Why or why not? - What do you think the positive changes would be for someone having gene therapy? - Would you have any concerns? ​ |
| Perceived barriers to access | - Even though gene therapies exist for some conditions, not everybody chooses to use them. What do you think prevents people from using gene therapies? - Some people have accessed gene therapies in different ways, for example through clinical trials, going overseas, crowd sourcing, paying for it themselves, or when it is publicly funded. How would you ​access gene therapy for you or your family ​member?​ |
| Uncertainties | - Gene therapies are a new way of treating people. This means that there are some things that we still don’t know about them. What more would you like to know about gene therapy before you made a decision? |
