# Supplementary material for: Patient, consumer and societal values, perceptions and preferences on high-cost gene therapies
Source: Research Square preprint supplement (doi:10.21203/rs.3.rs-7872591/v1), 2025-11-20
Supplement: Supplementary file 4 [file afa57b4ee5c683a22c271a3c.docx]

**Table 3:** Themes and sub-themes arising from focus groups and interviews

| ***Theme*/**sub-theme | Participant group* | Indicative question/s | Example quote |
| --- | --- | --- | --- |
| ***Patient, disease and treatment considerations*** | | | |
| Disease prevalence | C, GP | Influences on decision making | ‘it depends on the number of people affected by this, the number of families who have someone with this condition … and also the impact it has’ [C] |
| Disease severity | C, GP | Influences on decision making | ‘Because those with … less severe symptoms might be more reluctant to engage in gene therapy’ [C] |
| Patient life stage | C | Influences on decision making | ‘Glad to be an advocate for it, but my time's come and gone for having a crack at the trial. As I said, 20s, 30s, even 40s, I would've gone’ [C] |
| Evidence of prior success | C, GP | Influences on decision making | ‘I'd actually like to hear from someone who's gone through the treatment. Just get their thoughts and feelings on what they've gone through and how the process is so you can make an informed decision’ [GP] |
| Availability and type of alternative treatments | GP | Influences on decision making | ‘how many different treatments are available? If I have a particular condition, do I only have one line of treatment or are there a couple of choices that I can make?’ [GP] |
| ***Accessing gene therapy*** | | | |
| Patient/clinician awareness of gene therapy options | C, GP | Perceived barriers to access | ‘my GP … didn't really know the side effects. Since it's a new development, he doesn't really understand how it's important, he doesn't understand how it could affect the human body when used’ [C] |
| Availability of person-centred care | C | Influences on decision making | ‘I think person-centred care is so important just in general, in making patients feel comfortable and building their knowledge and making them feel like they can make executive decisions about their care’ [C] |
| Trust in healthcare professionals | C, GP | Influences on decision making | ‘So I think if my nursing team and my haematologist had the risks and benefits outlaid for me and were able to sit down in depth with me and discuss … that would influence me quite a lot because I trust their opinion’ [C] |
| Wait time to receive gene therapy | GP | Perceived barriers to access | ‘I remember during COVID surgeries and people waiting on the waiting list for years. So is there a backlog for this treatment?’ [GP] |
| Distance from gene therapy centre | C, GP | Perceived barriers to access | ‘where can you go to, to access these services? How would they make it easily accessible for even people living in rural areas to access? That's a concern for me’ [C] |
| ***Impacts of gene therapy: benefits and harms*** | | | |
| Minimising symptoms or cure | C | Potential benefits and harms | ‘you’d be able to do more of the normal stuff without the damage, because every bleed causes – it all adds up, it's detriment to joints. So that'd be brilliant’ [C] |
| Quality of life improvements | C, GP | Influences on decision making Potential benefits and harms | ‘the quality-of-life issue is one of importance as well … So [for example], travel, you don't have to take your Factor [VIII] with you. It opens up opportunities for employment’ [C] |
| Societal benefits | C, GP | Influences on decision making Potential benefits and harms | ‘Because a patient is not having an illness in a vacuum. I said there's a domino effect. So, if you can improve one thing, those positives can spillover other areas as well and everyone can benefit’ [C] |
| Adverse effects | C, GP | Influences on decision making Perceived barriers to access | ‘But long term as well, what does [it do] to me? Does it fix me? … does this also cause another disease that no one ever thought of?’ [GP] |
| ***Impacts of gene therapy: costs*** | | | |
| Individual out of pocket costs | C | Perceived barriers to access | ‘If you've got multiple children with sickle cell that would be I think, quite a large contributing factor.’ [C] |
| Health system costs | GP | Influences on decision making | ‘ these are incredibly expensive technologies … when the government's going to spend money, [does] the net benefits outweigh the costs? Could that money be better spent elsewhere to cure things that are perhaps easier to cure?’ [GP] |
| Cost savings to the health system | C | Influences on decision making | ‘If this reduces our rates of haemorrhaging and bleeding, then it's actually a better thing, because you don't have the issues of cost’ [C] |
| ***Uncertainties related to gene therapy*** | | | |
| Details on the process | C | Uncertainties | ‘Understanding the full treatment option. How it's been taken. How would the treatment be? How long the whole process is involved?’ [C] |
| Effectiveness | C, GP | Uncertainties | ‘Successful rate and how long does it take to actually cure the disease? Is it going to be done within one shot, or multiple shots a month or lifelong treatment?’ [GP] |
| Alternative treatments becoming available in the future | C, GP | Uncertainties | ‘the changes to medicine and the changes in healthcare seem to be pretty exponential at the moment... Like, are people holding out because they think, well, I can just keep on going for the next five years and it might be even better then? And if I have this gene therapy, does that then close the doors on future possible better [treatments]?’ [C] |

*C= consumers, GP = general population
